# Supplementary material
Source: PubMed Central journal article supplement (PMC4933328)
Supplement: NIHMS788858-supplement-Supplemental_Material.pdf [file NIHMS788858-supplement-Supplemental_Material.pdf]

|                                          |                                     |                                          |                                                                                     |                                                                                                     |                                   |                                |
|------------------------------------------|-------------------------------------|------------------------------------------|-------------------------------------------------------------------------------------|-----------------------------------------------------------------------------------------------------|-----------------------------------|--------------------------------|
| Lipid treatment                          | X                                   | X                                        | X                                                                                   | X                                                                                                   | X                                 | X                              |
| Body mass index                          | X                                   | X                                        | X                                                                                   | X                                                                                                   | X                                 | X                              |
| Fasting blood glucose                    | X                                   | X                                        | X                                                                                   | X                                                                                                   | X                                 | X                              |
| Diabetes treatment                       | X                                   | X                                        | X                                                                                   | X                                                                                                   | X                                 | X                              |
| Smoking                                  | X                                   | X                                        | X                                                                                   | X                                                                                                   | X                                 | X                              |
| Family history                           | Missing†                            | Missing†                                 | Self-report: parental stroke or MI, parental cause of death                         | Self report: parental stroke or MI, parental cause of death                                         | Incompatible; taken as missing§   | Incompatible; taken as missing |
| Premature family history                 | Missing†                            | Missing†                                 | Self-report: parental MI at age<60 years,‡ parental cause of death and age at death | Self report: parental stroke or MI and age at first event, parental cause of death and age at death | Incompatible; taken as missing§   | Incompatible; taken as missing |
| <b>Follow-Up</b>                         |                                     |                                          |                                                                                     |                                                                                                     |                                   |                                |
| Exam interval (years)                    | Every 2 years                       | Every 3-8 years                          | Every 2-5 years                                                                     | Every 3 years through 1996-98, plus 1 exam 2011-2013                                                | N/A                               | Annually, 1989-1999            |
| Number of exams                          | 32                                  | 9                                        | 8                                                                                   | 5                                                                                                   | 1                                 | 11                             |
| Last exam                                | 2012-2014                           | 2011-2014                                | 2010-2011                                                                           | 2011-2013                                                                                           | 1988-94                           | 1999                           |
| Surveillance method (interval, in years) | Community surveillance (continuous) | Medical record surveillance (continuous) | Phone interview (1)                                                                 | Phone interview (1) Community surveillance (continuous)                                             | National Death Index (continuous) | Phone interview (0.5)          |
| Date of last follow-up                   | 2007                                | 2007                                     | 2010                                                                                | 2007                                                                                                | 2006                              | 1999                           |

---

data available

---

Outcomes Ascertainment

---

| Method          | Adjudicated | Adjudicated | Adjudicated | Adjudicated | ICD-9 or -10 | Adjudicated |
|-----------------|-------------|-------------|-------------|-------------|--------------|-------------|
| Nonfatal MI     | X           | X           | X           | X           |              | X           |
| Ischemic stroke | X           | X           | X           | X           |              | X           |
| CHD death       | X           | X           | X           | X           | X            | X           |
| CVD death       | X           | X           | X           | X           | X            | X           |
| All-cause death | X           | X           | X           | X           | X            | X           |

---

\*The table shows information for participants included in the Lifetime Risk Pooling Project dataset;<sup>1</sup> further details on individual complete cohorts are available via multiple sources for the Atherosclerosis Risk in Communities Study,<sup>2-6</sup> Cardiovascular Health Study,<sup>7-10</sup> Framingham Heart Study,<sup>11-16</sup> Framingham Offspring Study,<sup>11, 17-19</sup> Coronary Artery Risk Development in Young Adults Study,<sup>20, 21</sup> and National Health and Nutrition Examination Survey III-Mortality.<sup>22-26</sup>

†Family history information is not released with the Framingham datasets.

‡For the present analysis, the definition of premature CVD was first CHD incident or stroke at age  $\leq 55$  years in the father (or  $\leq 60$  years in the mother); therefore positive paternal history of MI at age  $< 60$  years was not considered premature CVD.

§Participants were asked, “Has either biological parent ever been told by a doctor that he or she had... High blood pressure or stroke before the age of 50? Heart attack or angina before the age of 50?”<sup>25</sup> Not compatible with family history definitions for the present analysis due to grouping of endpoints, lack of total (non-premature) family history data, and difference in age thresholds ( $< 50$  years) from those used for premature CVD in the present analysis ( $\leq 55$  or  $\leq 60$  years in the father or mother, respectively).

|| Participants were asked about the cardiovascular health histories of their siblings but not their parents.<sup>7</sup> Not compatible with family history definitions for the present analysis, which focused on parental history.

TC, total cholesterol; LDL-C, low density lipoprotein cholesterol; HDL-C, high density lipoprotein cholesterol; TG, triglycerides; MI, myocardial infarction; CHD, coronary heart disease; CVD, cardiovascular disease.

**Supplemental Table 2. Baseline characteristics of the familial hypercholesterolemia phenotype (LDL-C  $\geq$ 190 mg/dL) and referent (LDL-C <130 mg/dL) groups, by index age.\***

| Index Age, Years                            | Index Age and LDL Cholesterol Category |                           |                 |                           |                 |                           |
|---------------------------------------------|----------------------------------------|---------------------------|-----------------|---------------------------|-----------------|---------------------------|
|                                             | 50-59                                  |                           | 60-69           |                           | 70-79           |                           |
| Category of baseline LDL cholesterol, mg/dL | <130 (referent)                        | $\geq$ 190 (FH phenotype) | <130 (referent) | $\geq$ 190 (FH phenotype) | <130 (referent) | $\geq$ 190 (FH phenotype) |
| Baseline person-exams                       | 8,933 (48%)                            | 1,440 (7.8%)              | 6,673 (47%)     | 1,135 (7.9%)              | 3,792 (54%)     | 364 (5.1%)                |
| Follow-up, person-years                     | 140,335                                | 26,605                    | 96,472          | 17,848                    | 41,419          | 4,316                     |
| Female                                      | 5,062 (57%)                            | 880 (66%) <sup>†</sup>    | 3,483 (52%)     | 768 (68%) <sup>†</sup>    | 1,968 (52%)     | 267 (73%) <sup>†</sup>    |
| African-American                            | 1,977 (22%)                            | 323 (22%)                 | 1,060 (16%)     | 248 (22%) <sup>†</sup>    | 436 (12%)       | 41 (11%)                  |
| Total cholesterol, mg/dL                    | 184 (28)                               | 293 (30) <sup>†</sup>     | 188 (30)        | 294 (32) <sup>†</sup>     | 187 (29)        | 297 (29) <sup>†</sup>     |
| LDL cholesterol, mg/dL                      | 100 (26)                               | 214 (25) <sup>†</sup>     | 101 (26)        | 213 (27) <sup>†</sup>     | 100 (25)        | 213 (22) <sup>†</sup>     |
| HDL cholesterol, mg/dL                      | 55 (19)                                | 48 (14) <sup>†</sup>      | 53 (19)         | 49 (13) <sup>†</sup>      | 53 (18)         | 51 (14)                   |
| Non-HDL cholesterol, mg/dL                  | 129 (29)                               | 246 (30) <sup>†</sup>     | 135 (30)        | 245 (31) <sup>†</sup>     | 134 (29)        | 245 (27) <sup>†</sup>     |
| Systolic blood pressure, mm Hg              | 122 (18)                               | 126 (20) <sup>†</sup>     | 129 (20)        | 133 (22) <sup>†</sup>     | 136 (21)        | 143 (22) <sup>†</sup>     |
| Diastolic blood pressure, mm Hg             | 75 (11)                                | 78 (11) <sup>†</sup>      | 73 (11)         | 75 (12) <sup>†</sup>      | 71 (11)         | 75 (11) <sup>†</sup>      |
| Body mass index, kg/m <sup>2</sup>          | 27.8 (6.0)                             | 28.1 (5.0)                | 27.5 (5.3)      | 27.9 (4.7) <sup>†</sup>   | 26.9 (4.8)      | 27.4 (4.8)                |
| Smoking                                     | 2,277 (26%)                            | 490 (34%) <sup>†</sup>    | 1,354 (20%)     | 260 (23%) <sup>†</sup>    | 479 (13%)       | 41 (11%)                  |
| Diabetes mellitus                           | 804 (9.0%)                             | 168 (11.7%) <sup>†</sup>  | 852 (12.9%)     | 183 (16.2%) <sup>†</sup>  | 434 (12.1%)     | 35 (9.9%)                 |

|                                    |               |              |               |             |               |              |
|------------------------------------|---------------|--------------|---------------|-------------|---------------|--------------|
| Family history of CVD‡             | 2,266 (36%)   | 413 (46%)†   | 1,634 (40%)   | 267 (43%)   | 454 (43%)     | 17 (34%)     |
| Hypertension treatment at baseline | 2,142 (24.0%) | 402 (27.9%)† | 2,346 (35.2%) | 416 (36.7%) | 1,577 (42.5%) | 126 (35.1%)† |
| Cholesterol treatment at baseline  | 478 (5.4%)    | 85 (5.9%)    | 482 (7.2%)    | 89 (7.9%)   | 325 (9.9%)    | 25 (7.5%)    |

\*Table 1 shows baseline characteristics for index ages 20-49 years.

†p<0.05 for the comparison between participants at same index age with LDL-C≥190 vs. <130 mg/dL.

‡Estimate among cohorts with family history data available (see Supplemental Table 1).

Continuous data presented as mean (SD), categorical data presented as N(%).

LDL, low-density lipoprotein; LDL-C, LDL cholesterol; FH, familial hypercholesterolemia; CVD, cardiovascular disease; HDL, high-density lipoprotein.

**Supplemental Table 3. Baseline characteristics of men and women with the familial hypercholesterolemia phenotype (LDL-C  $\geq$ 190 mg/dL), by index age.**

|                                    | Index Age, Years |            |            |             |             |            |
|------------------------------------|------------------|------------|------------|-------------|-------------|------------|
|                                    | 20-29            | 30-39      | 40-49      | 50-59       | 60-69       | 70-79      |
| <i>Men</i>                         |                  |            |            |             |             |            |
| Baseline person-exams              | 49               | 144        | 342        | 560         | 367         | 97         |
| Follow-up, person-years            | 1,145            | 3,154      | 6,398      | 9,775       | 5,293       | 1,038      |
| CHD death or nonfatal MI           | 3 (6.1%)         | 19 (13.2%) | 77 (22.5%) | 143 (25.5%) | 111 (30.3%) | 26 (26.8%) |
| African-American                   | 23 (47%)         | 40 (28%)   | 77 (23%)   | 115 (21%)   | 89 (24%)    | 13 (13%)   |
| Total cholesterol, mg/dL           | 283 (34)         | 280 (27)   | 286 (31)   | 287 (27)    | 285 (26)    | 286 (26)   |
| LDL cholesterol, mg/dL             | 213 (34)         | 208 (21)   | 211 (25)   | 212 (22)    | 210 (21)    | 211 (20)   |
| HDL cholesterol, mg/dL             | 47 (12)          | 44 (10)    | 43 (12)    | 43 (12)     | 44 (11)     | 44 (11)    |
| Non-HDL cholesterol, mg/dL         | 235 (34)         | 236 (26)   | 243 (31)   | 244 (27)    | 241 (26)    | 242 (34)   |
| Systolic blood pressure, mm Hg     | 120 (11)         | 120 (13)   | 123 (16)   | 125 (18)    | 132 (20)    | 140 (21)   |
| Diastolic blood pressure, mm Hg    | 75 (11)          | 78 (10)    | 80 (12)    | 79 (11)     | 76 (11)     | 76 (10)    |
| Body mass index, kg/m <sup>2</sup> | 26.1 (3.7)       | 27.4 (3.6) | 28.3 (4.1) | 28.0 (3.9)  | 27.7 (4.1)  | 27.2 (4.2) |
| Smoking                            | 18 (37%)         | 84 (59%)   | 149 (44%)  | 182 (33%)   | 96 (26%)    | 16 (16%)   |
| Diabetes mellitus                  | 1 (2.0%)         | 4 (2.8%)   | 12 (3.5%)  | 57 (10.2%)  | 65 (17.8%)  | 13 (13.5%) |
| Family history of CVD <sup>†</sup> | 10 (33%)         | 18 (35%)   | 67 (39%)   | 162 (45%)   | 100 (45%)   | 6 (29%)    |
| Hypertension treatment at baseline | 1 (2.0%)         | 6 (4.2%)   | 37 (10.8%) | 146 (26.1%) | 122 (33.2%) | 28 (29.2%) |
| Cholesterol treatment at baseline  | 0                | 3 (2.5%)   | 16 (4.7%)  | 39 (7.0%)   | 30 (8.2%)   | 8 (8.9%)   |

| <i>Women</i>                       |            |            |             |              |              |            |
|------------------------------------|------------|------------|-------------|--------------|--------------|------------|
| Baseline person-exams              | 57         | 70         | 249         | 880          | 768          | 267        |
| Follow-up, person-years            | 1,389      | 1,522      | 4,872       | 16,830       | 12,555       | 3,278      |
| CHD death or nonfatal MI           | 4 (7.0%)   | 5 (7.1%)   | 40 (16.1%)  | 146 (16.6%)* | 155 (20.2%)* | 47 (17.6%) |
| African-American                   | 25 (44%)   | 23 (33%)   | 77 (31%)*   | 208 (24%)    | 159 (21%)    | 28 (10%)   |
| Total cholesterol, mg/dL           | 284 (28)   | 285 (38)   | 292 (37)*   | 298 (32)*    | 298 (33)*    | 301 (29)*  |
| LDL cholesterol, mg/dL             | 213 (23)   | 213 (28)   | 215 (33)    | 215 (26)*    | 214 (30)*    | 214 (22)   |
| HDL cholesterol, mg/dL             | 51 (13)    | 49 (12)*   | 50 (13)*    | 51 (14)*     | 51 (13)*     | 54 (14)*   |
| Non-HDL cholesterol, mg/dL         | 233 (26)   | 237 (34)   | 242 (35)    | 247 (32)*    | 247 (34)*    | 246 (28)   |
| Systolic blood pressure, mm Hg     | 110 (11)*  | 115 (20)*  | 122 (20)    | 127 (21)     | 134 (23)     | 144 (23)   |
| Diastolic blood pressure, mm Hg    | 69 (10)*   | 73 (13)*   | 78 (12)*    | 77 (11)*     | 75 (12)*     | 75 (12)    |
| Body mass index, kg/m <sup>2</sup> | 26.3 (5.9) | 28.5 (6.8) | 28.9 (5.8)  | 28.2 (5.6)   | 28.0 (5.0)   | 27.5 (5.0) |
| Smoking                            | 28 (49%)   | 28 (40%)*  | 110 (44%)   | 308 (35%)    | 164 (21%)    | 25 (9%)    |
| Diabetes mellitus                  | 0          | 1 (1.4%)   | 23 (9.2%)*  | 111 (12.6%)  | 118 (15.5%)  | 22 (8.6%)  |
| Family history of CVD†             | 11 (37%)   | 8 (29%)    | 52 (39%)    | 251 (47%)    | 167 (43%)    | 11 (38%)   |
| Hypertension treatment at baseline | 2 (3.5%)   | 4 (5.7%)   | 65 (26.1%)* | 256 (29.1%)  | 294 (38.3%)  | 98 (37.3%) |
| Cholesterol treatment at baseline  | 0          | 1 (1.7%)   | 10 (4.1%)   | 46 (5.3%)    | 59 (7.7%)    | 17 (7.0%)  |

\*p<0.05 for the comparison between men and women at same index age.

†Estimate among cohorts with family history data available (see Supplemental Table 1).

Continuous data are presented as mean (SD), categorical data are presented as N(%).



LDL, low-density lipoprotein; LDL-C, LDL cholesterol; CHD, coronary heart disease; MI, myocardial infarction; HDL, high-density lipoprotein; CVD, cardiovascular disease.

**Supplemental Table 4. Race-specific familial hypercholesterolemia phenotype (defined by LDL-C $\geq$ 190 mg/dL) prevalence and coronary heart disease death or nonfatal myocardial infarction at each index age.**

| Index Age (years) | African American            |                     |                                                            |                                                        |                                 | Non-African American           |                     |                                                            |                                                        |                                 |
|-------------------|-----------------------------|---------------------|------------------------------------------------------------|--------------------------------------------------------|---------------------------------|--------------------------------|---------------------|------------------------------------------------------------|--------------------------------------------------------|---------------------------------|
|                   | FH Phenotype Prevalence (%) | Observed CHD Events | Unadjusted CHD Rate per 1000 Person-Years for FH Phenotype | Unadjusted CHD Rate per 1000 Person-Years for Referent | Adjusted Hazard Ratio* (95% CI) | FH Phenotype Prevalence (%)    | Observed CHD Events | Unadjusted CHD Rate per 1000 Person-Years for FH Phenotype | Unadjusted CHD Rate per 1000 Person-Years for Referent | Adjusted Hazard Ratio* (95% CI) |
|                   | 20-29                       | 1.7                 | 3                                                          | 2.8                                                    | 0.5                             | 3.7 <sup>†</sup><br>(1.1-13.1) | 1.3                 | 4                                                          | 2.8                                                    | 0.5                             |
| 30-39             | 2.3                         | 5                   | 4.3                                                        | 0.7                                                    | 2.5 <sup>†</sup><br>(0.3-21.2)  | 2.6                            | 19                  | 5.8                                                        | 0.9                                                    | 3.3<br>(1.9-6.0)                |
| 40-49             | 4.7                         | 19                  | 8.2                                                        | 2.6                                                    | 2.3<br>(1.4-4.0)                | 4.6                            | 98                  | 11.9                                                       | 2.2                                                    | 3.0<br>(2.3-3.9)                |
| 50-59             | 8.7                         | 70                  | 14.8                                                       | 6.0                                                    | 2.1<br>(1.6-2.8)                | 7.6                            | 219                 | 10.9                                                       | 4.7                                                    | 2.0<br>(1.7-2.4)                |
| 60-69             | 10.4                        | 67                  | 20.0                                                       | 10.5                                                   | 2.0<br>(1.5-2.7)                | 7.4                            | 199                 | 14.8                                                       | 8.3                                                    | 1.9<br>(1.6-2.3)                |
| 70-79             | 5.0                         | 10                  | 26.6                                                       | 14.5                                                   | 1.5 <sup>†</sup><br>(0.6-3.7)   | 5.2                            | 63                  | 16.8                                                       | 15.0                                                   | 1.2<br>(0.9-1.6)                |

\*Adjusted for: age, sex, body mass index, diabetes mellitus, smoking, systolic blood pressure, antihypertensive therapy, and cohort; all except index age 20-29 years also adjusted for high-density lipoprotein cholesterol level and cholesterol medication use. Referent is (race-specific) participants with LDL-C<130mg/dL.

<sup>†</sup>Estimates may be unstable due to small numbers of events.

LDL-C, low-density lipoprotein cholesterol; FH, familial hypercholesterolemia; CHD, coronary heart disease; CI, confidence interval.

**Supplemental Table 5. Risk of coronary heart disease death (only) for the familial hypercholesterolemia phenotype, defined by LDL-C $\geq$ 190 mg/dL.**

| Index Age<br>(years) | Baseline<br>Person-Exams | Person-Years<br>of Follow-Up | Observed<br>CHD Deaths | Unadjusted CHD Death Rate<br>per 1000 Person-Years for<br>FH Phenotype | Unadjusted CHD Death Rate<br>per 1000 Person-Years for<br>Referent | Adjusted Hazard<br>Ratio*<br>(95% CI) |      |                  |
|----------------------|--------------------------|------------------------------|------------------------|------------------------------------------------------------------------|--------------------------------------------------------------------|---------------------------------------|------|------------------|
| 20-29                | 106                      | 2,534                        | 2                      | Men:                                                                   | 1.7                                                                | Men:                                  | 0.1  | 6.4 <sup>†</sup> |
|                      |                          |                              |                        | Women:                                                                 | 0                                                                  | Women:                                | 0.03 | (1.3-31.6)       |
| 30-39                | 214                      | 4,676                        | 4                      | Men:                                                                   | 1.3                                                                | Men:                                  | 0.3  | 2.4 <sup>†</sup> |
|                      |                          |                              |                        | Women:                                                                 | 0                                                                  | Women:                                | 0.03 | (0.8-7.2)        |
| 40-49                | 591                      | 11,270                       | 41                     | Men:                                                                   | 4.4                                                                | Men:                                  | 1.5  | 2.6              |
|                      |                          |                              |                        | Women:                                                                 | 2.7                                                                | Women:                                | 0.2  | (1.7-3.8)        |
| 50-59                | 1,440                    | 26,605                       | 135                    | Men:                                                                   | 7.7                                                                | Men:                                  | 2.8  | 2.6              |
|                      |                          |                              |                        | Women:                                                                 | 3.6                                                                | Women:                                | 0.9  | (2.0-3.2)        |
| 60-69                | 1,135                    | 17,848                       | 134                    | Men:                                                                   | 11.1                                                               | Men:                                  | 5.8  | 1.8              |
|                      |                          |                              |                        | Women:                                                                 | 6.0                                                                | Women:                                | 2.6  | (1.4-2.2)        |
| 70-79                | 364                      | 4,316                        | 45                     | Men:                                                                   | 14.4                                                               | Men:                                  | 9.3  | 1.3              |
|                      |                          |                              |                        | Women:                                                                 | 9.2                                                                | Women:                                | 6.3  | (0.9-1.9)        |

\*Adjusted for: age, sex, race, body mass index, diabetes mellitus, smoking, systolic blood pressure, antihypertensive therapy, HDL-C, cholesterol medication use, and cohort. Referent is participants with LDL-C $<$ 130mg/dL.

<sup>†</sup>Calculations based on small numbers of events; therefore, estimates may be unstable, and adjustment is not made for HDL-C or cholesterol medication.

LDL-C, low-density lipoprotein cholesterol; CHD, coronary heart disease; CI, confidence interval; HDL-C, high-density lipoprotein cholesterol.

**Supplemental Table 6. Risk of total atherosclerotic cardiovascular disease\* for the familial hypercholesterolemia phenotype, defined by LDL-C $\geq$ 190 mg/dL.**

| Index Age<br>(years) | Baseline Person-<br>Exams | Person-Years of<br>Follow-Up | Observed ASCVD<br>Events | Unadjusted ASCVD Rate<br>per 1000 Person-Years for<br>FH Phenotype | Unadjusted ASCVD Rate per<br>1000 Person-Years for<br>Referent | Adjusted Hazard<br>Ratio†<br>(95% CI) |
|----------------------|---------------------------|------------------------------|--------------------------|--------------------------------------------------------------------|----------------------------------------------------------------|---------------------------------------|
| 20-29                | 106                       | 2,534                        | 9                        | 3.6                                                                | 0.8                                                            | 4.1‡<br>(1.2-13.4)                    |
| 30-39                | 214                       | 4,676                        | 31                       | 7.0                                                                | 1.4                                                            | 3.4<br>(2.1-5.5)                      |
| 40-49                | 591                       | 11,270                       | 142                      | 13.8                                                               | 3.6                                                            | 2.3<br>(1.8-2.8)                      |
| 50-59                | 1,440                     | 26,605                       | 387                      | 16.0                                                               | 7.6                                                            | 1.8<br>(1.5-2.0)                      |
| 60-69                | 1,135                     | 17,848                       | 362                      | 22.6                                                               | 13.8                                                           | 1.6<br>(1.4-1.8)                      |
| 70-79                | 364                       | 4,316                        | 103                      | 26.2                                                               | 24.6                                                           | 1.0<br>(0.8-1.3)                      |

\*Total atherosclerotic cardiovascular disease: coronary heart disease death, nonfatal myocardial infarction, or ischemic stroke.

†Adjusted for: age, sex, race, body mass index, diabetes mellitus, smoking, systolic blood pressure, antihypertensive therapy, high-density lipoprotein cholesterol, cholesterol medication use, and cohort. Referent is participants with LDL-C<130mg/dL.

‡Estimate may be unstable due to small numbers of events.

LDL-C, low-density lipoprotein cholesterol; ASCVD, atherosclerotic cardiovascular disease; CI, confidence interval.

## SUPPLEMENTAL REFERENCES

1. Wilkins JT, Karmali KN, Huffman MD, Allen NB, Ning H, Berry JD, Garside DB, Dyer A, Lloyd-Jones DM. Data resource profile: the Cardiovascular Disease Lifetime Risk Pooling Project. *Int J Epidemiol*. 2015;44:1557-64.
2. Atherosclerosis Risk in Communities Study. The University of North Carolina at Chapel Hill Collaborative Studies Coordinating Center website. <http://www2.csc.unc.edu/aric/>. Updated 2016. Accessed April 8, 2016.
3. The ARIC investigators. The Atherosclerosis Risk in Communities (ARIC) Study. *Am J Epidemiol*. 1989;129:687-702.
4. Rosamond WD, Folsom AR, Chambless LE, Wang CH, McGovern PG, Howard G, Copper LS, Shahar E. Stroke incidence and survival among middle-aged adults: 9-year follow-up of the Atherosclerosis Risk in Communities (ARIC) cohort. *Stroke*. 1999;30:736-43.
5. Pereira MA, Schreiner PJ, Pankow JS, Williams RR, Higgins M, Province MA, Rao DC. The Family Risk Score for coronary heart disease: associations with lipids, lipoproteins, and body habitus in a middle-aged bi-racial cohort: The ARIC study. *Ann Epidemiol*. 2000;10:239-45.
6. Borrell LN, Diez Roux AV, Rose K, Catellier D, Clark BL. Neighbourhood characteristics and mortality in the Atherosclerosis Risk in Communities Study. *Int J Epidemiol*. 2004;33:398-407.
7. The Cardiovascular Health Study. National Heart, Lung and Blood Institute and University of Washington Coordinating Center website. <https://chs-nhlbi.org/>. 2011. Updated 2016. Accessed April 8, 2016.
8. Fried LP, Borhani NO, Enright P, Furberg CD, Gardin JM, Kronmal RA, Kuller LH, Manolio TA, Mittelmark MB, Newman A, O'Leary DH, Psaty B, Rautaharju P, Tracy RP, Weiler PG. The Cardiovascular Health Study: design and rationale. *Ann Epidemiol*. 1991;1:263-76.
9. Price TR, Psaty B, O'Leary D, Burke G, Gardin J. Assessment of cerebrovascular disease in the Cardiovascular Health Study. *Ann Epidemiol*. 1993;3:504-7.
10. Ives DG, Fitzpatrick AL, Bild DE, Psaty BM, Kuller LH, Crowley PM, Cruise RG, Theroux S. Surveillance and ascertainment of cardiovascular events. The Cardiovascular Health Study. *Ann Epidemiol*. 1995;5:278-85.
11. Framingham Heart Study: a project of the National Heart, Lung, and Blood Institute and Boston University. Framingham Heart Study website. <https://www.framinghamheartstudy.org/researchers/index.php>. Updated 2016. Accessed April 8, 2016.
12. Dawber TR, Kannel WB, Lyell LP. An approach to longitudinal studies in a community: the Framingham Study. *Ann N Y Acad Sci*. 1963;107:539-56.
13. Friedman GD, Kannel WB, Dawber TR, McNamara PM. An evaluation of follow-up methods in the Framingham Heart Study. *Am J Public Health Nations Health*. 1967;57:1015-24.
14. Abbott R, McGee D. The Framingham Study: an epidemiological investigation of cardiovascular disease, section 37: the probability of developing certain cardiovascular diseases in eight years at specified values of some characteristics. Bethesda, MD: National Heart, Lung, and Blood Institute; 1987.
15. D'Agostino RB, Kannel WB. Epidemiological background and design: The Framingham Study. In: Proceedings of the American Statistical Associations Sesquicentennial Invited Paper Sessions 1988 and 1989. Alexandria, VA: American Statistical Association; 1989:707-18.
16. Lloyd-Jones DM, Leip EP, Larson MG, D'Agostino RB, Beiser A, Wilson PWF, Wolf PA, Levy D. Prediction of lifetime risk for cardiovascular disease by risk factor burden at 50 years of age. *Circulation*. 2006;113:791-98.
17. Feinleib M, Kannel WB, Garrison RJ, McNamara PM, Castelli WP. The Framingham Offspring Study. Design and preliminary data. *Prev Med*. 1975;4:518-25.
18. Kannel WB, Feinleib M, McNamara PM, Garrison RJ, Castelli WP. An investigation of coronary heart disease in families. The Framingham Offspring Study. *Am J Epidemiol*. 1979;110:281-90.
19. Murabito JM, Nam BH, D'Agostino RB Sr, Lloyd-Jones DM, O'Donnell CJ, Wilson PW. Accuracy of offspring reports of parental cardiovascular disease history: the Framingham Offspring Study. *Ann Intern Med*. 2004;140:434-40.
20. CARDIA: Coronary Artery Risk Development in Young Adults. Division of Preventive Medicine at the University of Alabama at Birmingham website. <http://www.cardia.dopm.uab.edu/>. Updated March 2016. Accessed April 8, 2016.

21. Friedman GD, Cutter GR, Donahue RP, Hughes GH, Hulley SB, Jacobs DR Jr, Liu K, Savage PJ. CARDIA: study design, recruitment, and some characteristics of the examined subjects. *J Clin Epidemiol*. 1988;41:1105-16.
22. NHANES III (1988-1994). Centers for Disease Control and Prevention website. <http://www.cdc.gov/nchs/nhanes/nhanes3.htm>. Updated October 15, 2015. Accessed April 8, 2016.
23. NCHS Data Linkage Activities. Centers for Disease Control and Prevention website. <http://www.cdc.gov/nchs/data-linkage/index.htm>. Updated March 28, 2016. Accessed April 8, 2016.
24. National Death Index. Centers for Disease Control and Prevention website. <http://www.cdc.gov/nchs/ndi.htm>. Updated March 2, 2015. Accessed April 8, 2016.
25. National Center for Health Statistics. Plan and operation of the Third National Health and Nutrition Examination Survey, 1988-94. *Vital Health Stat*. 1994;1:1-407.
26. Office of Analysis and Epidemiology. *The Third National Health and Nutrition Examination Survey (NHANES III) linked mortality file, mortality follow-up through 2006*. Hyattsville, Maryland: National Center for Health Statistics; 2009.
